# Supplementary material for: Porous BN for hydrogen generation and storage
Source: Royal Society of Chemistry journal article supplement (doi:10.1039/c5ta01052g), 2015-01-01
Supplement: c5ta01052g1.pdf [file c5ta01052g1.pdf]

## Supplementary Information

### Porous BN for hydrogen generation and storage

Hui Zhang<sup>a,b</sup>, Chuan-Jia Tong<sup>a</sup>, Yongsheng Zhang<sup>c</sup>, Yan-Ning Zhang<sup>a,d</sup>, Li-Min Liu<sup>a\*</sup>

<sup>a</sup>Beijing Computational Science Research Center, Beijing 100084, China

<sup>b</sup>Normal college, Shenyang University, Shenyang 110044, China

<sup>c</sup>Key Laboratory of Materials Physics, Institute of Solid State Physics, Chinese Academy of Sciences, Hefei 230031, China

<sup>d</sup>Chengdu Green Energy and Green Manufacturing Technology R&D Center, Chengdu, Sichuan, 610207, China

Email: [limin.liu@csrc.ac.cn](mailto:limin.liu@csrc.ac.cn)

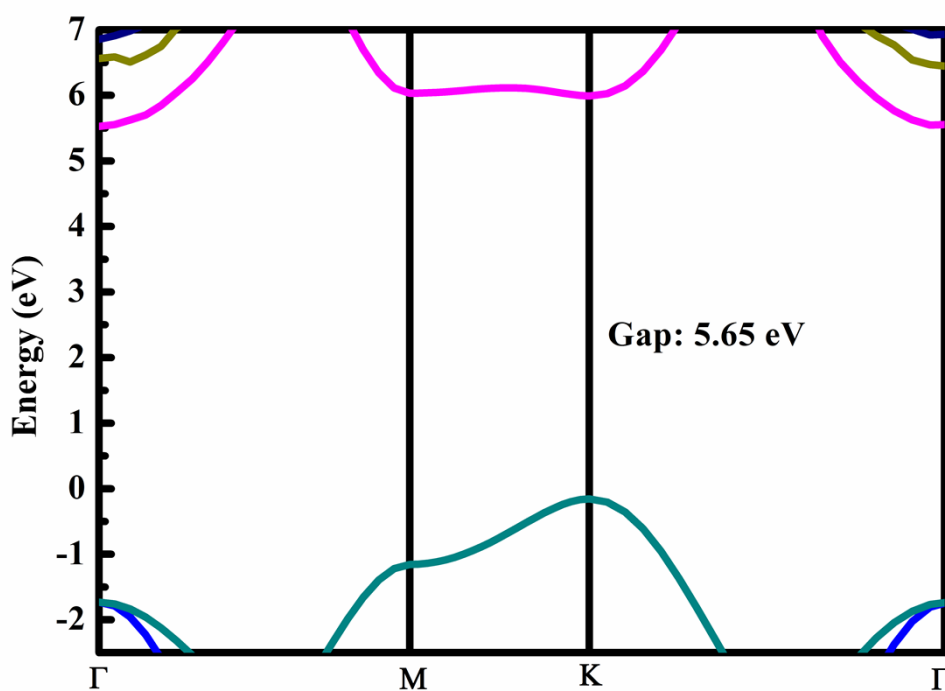

Fig. S1 Calculated band structure of ideal monolayer h-BN with the hybrid HSE06 functional.

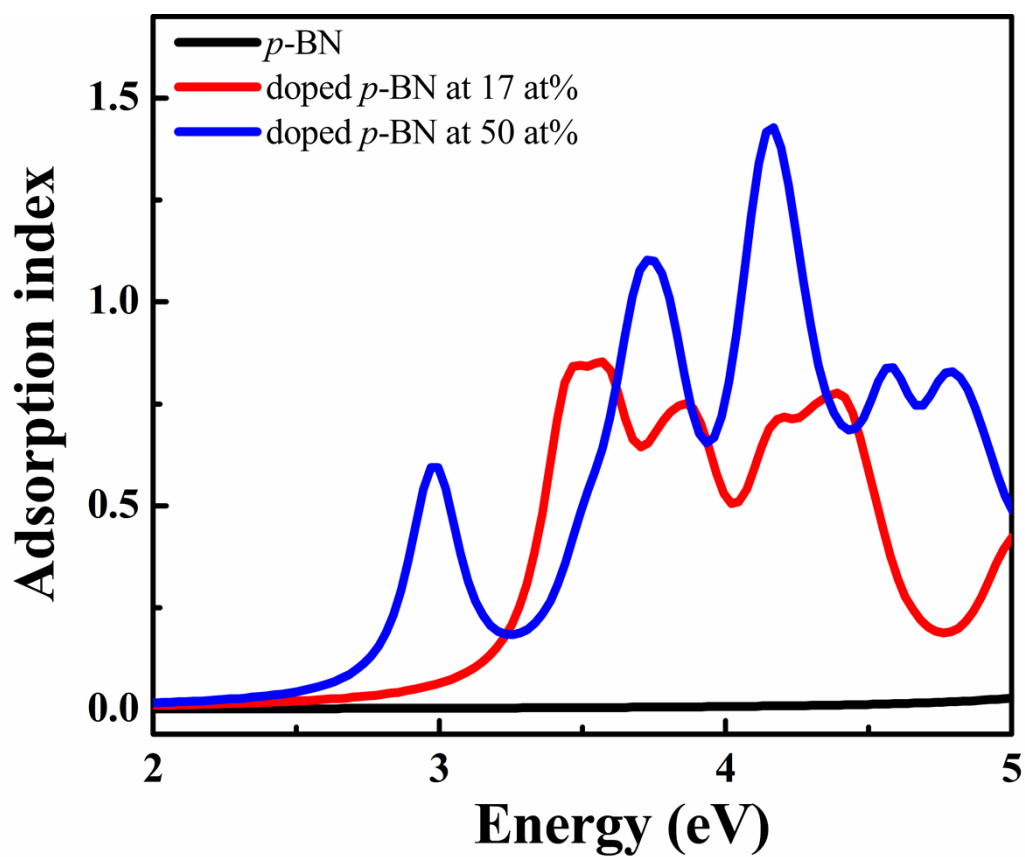

Fig. S2 Calculated optical absorption spectrum of the original and C-doped p-BN for the different constitute percentages with hybrid HSE06 functional.

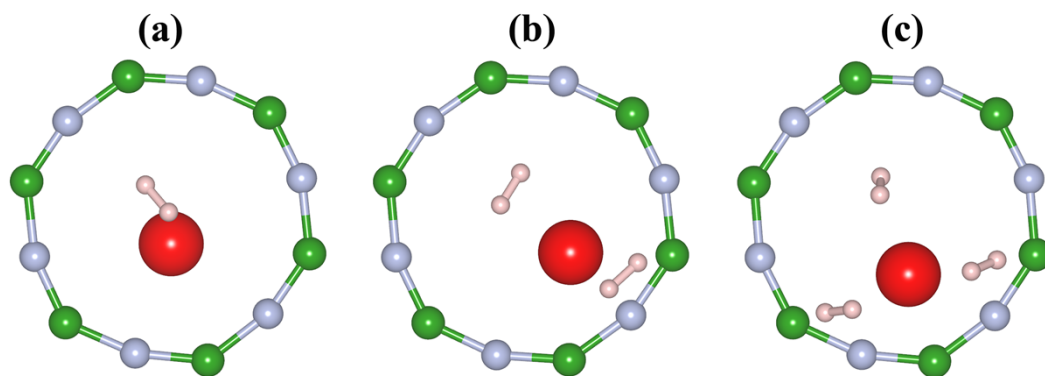

Fig. S3 The top view of atomic geometries of hydrogen on Li-decorated p-BN as the hydrogen capacity increases.

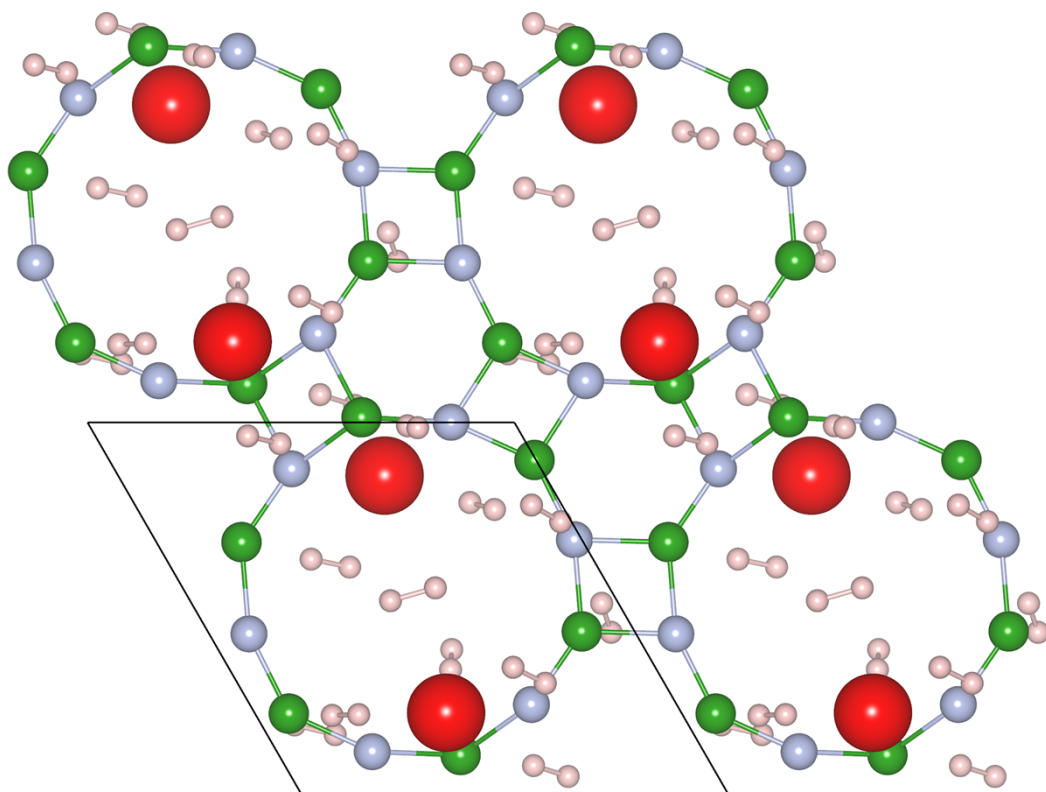

*Fig. S4 the top view of optimized geometry with hydrogen adsorption on the two sides of Li-decorated p-BN.*
